# Supplementary material
Source: publisher figshare collection journal article supplement (https://gsapubs.figshare.com/ndownloader/files/23301656)
Supplement: Supplementary file 1 [file 23301656]

## Sheet: Pernicana raw data.xls
D'Amato et al., HOLOCENE SLIP RATE VARIABILITY ALONG THE PERNICANA FAULT SYSTEM (MT. ETNA, ITALY): EVIDENCE FROM OFFSET LAVA FLOWS.
Run_ID	Sample	Alias	System	Run_Date	Run_Hour	Run_SecSince1904	PrincipalInvestigator	Material	Hole #	Project	Locality	File	Version	History	Comment	Fit_Type	Signal Norm.	Run Script	Fract_Deliv_To_MS	Weight	Heating_Dev	Pwr_Requested	Pwr_Achieved	Pwr_AchievedSD	Pwr_AchievedMax	OP_Temp	Emissivity	Tot_Dur_Heating	Dur_Heating_At_Req_Pwr	Holes	X_Y_Pos	Laser Scan File	Beam_Dia	Ar40_	Ar40_Er	Ar39_	Ar39_Er	Ar38_	Ar38_Er	Ar37_	Ar37_Er	Ar36_	Ar36_Er	Ar40_BslnCorOnly	Ar40_Er_BslnCorOnly	Ar39_BslnCorOnly	Ar39_Er_BslnCorOnly	Ar38_BslnCorOnly	Ar38_Er_BslnCorOnly
90223-1	RAG 1		32	2012-12-29	20.9667	3439659000	Dan Barfod	basalt gm	2	Davide	Etna	130.209.21.222	8.058	Ar40 = L @ --- @ ---; Ar39 = L @ --- @ ---; Ar38 = L @ --- @ ---; Ar37 = L @ --- @ ---; Ar36 = L @ --- @ ---; Imported on Dec 31, 2012 @ --- @ ---; Ar40 bk val,er = Cubic @ --- @ ---; Ar39 bk val,er = Average background @ --- @ ---; Ar38 bk val,er = Cubic @ --- @ ---; Ar37 bk val,er = Average background @ --- @ ---; Ar36 bk val,er = Cubic @ --- @ ---; Ar36 = P @ --- @ ---; Ar36 = P @ --- @ ---; A…	furnace-38360	PPLLPAAAAA	1	Unknown	0	0	Furnace	9	9	0	0	0	0	300	300	0			0	0.836179	0.0069387	0.00281	0.0001275	0.0007977	4.38e-05	0.0004335	4.08e-05	0.002917	3.71e-05	0.84881	0.0038	0.003031	0.00012	0.0009029	3.1e-05
90223-2	RAG 1		32	2012-12-29	21.9667	3439663000	Dan Barfod	basalt gm	2	Davide	Etna	130.209.21.222	8.058	Ar40 = L @ --- @ ---; Ar39 = L @ --- @ ---; Ar38 = L @ --- @ ---; Ar37 = L @ --- @ ---; Ar36 = L @ --- @ ---; Imported on Dec 31, 2012 @ --- @ ---; Ar40 bk val,er = Cubic @ --- @ ---; Ar39 bk val,er = Average background @ --- @ ---; Ar38 bk val,er = Cubic @ --- @ ---; Ar37 bk val,er = Average background @ --- @ ---; Ar36 bk val,er = Cubic @ --- @ ---; Ar36 = P @ --- @ ---; Ar37 = L @ --- @ ---; A…	furnace-38361	PPLLPAAAAA	1	Unknown	0	0	Furnace	10	10	0	0	0	0	300	300	0			0	1.10211	0.0061277	0.0045869	9.08e-05	0.0007694	4.11e-05	0.0004944	3.61e-05	0.0036386	6.91e-05	1.11227	0.002	0.0047919	8e-05	0.0008748	2.7e-05
90223-3	RAG 1		32	2012-12-29	22.5	3439665000	Dan Barfod	basalt gm	2	Davide	Etna	130.209.21.222	8.058	Ar40 = L @ --- @ ---; Ar39 = L @ --- @ ---; Ar38 = L @ --- @ ---; Ar37 = L @ --- @ ---; Ar36 = L @ --- @ ---; Imported on Dec 31, 2012 @ --- @ ---; Ar40 bk val,er = Cubic @ --- @ ---; Ar39 bk val,er = Average background @ --- @ ---; Ar38 bk val,er = Cubic @ --- @ ---; Ar37 bk val,er = Average background @ --- @ ---; Ar36 bk val,er = Cubic @ --- @ ---; Ar36 = P @ --- @ ---; Ar37 = L @ --- @ ---; A…	furnace-38362	PPLLPAAAAA	1	Unknown	0	0	Furnace	13	13	0	0	0	0	300	300	0			0	4.04106	0.0060192	0.0408787	7.79e-05	0.0029666	3.54e-05	0.0017633	2.83e-05	0.0132508	5.28e-05	4.01797	0.0012	0.040756	6.5e-05	0.0030587	1.7e-05
90223-4	RAG 1		32	2012-12-29	23.1833	3439667000	Dan Barfod	basalt gm	2	Davide	Etna	130.209.21.222	8.058	Ar40 = L @ --- @ ---; Ar39 = L @ --- @ ---; Ar38 = L @ --- @ ---; Ar37 = L @ --- @ ---; Ar36 = L @ --- @ ---; Imported on Dec 31, 2012 @ --- @ ---; Ar40 bk val,er = Cubic @ --- @ ---; Ar39 bk val,er = Average background @ --- @ ---; Ar38 bk val,er = Cubic @ --- @ ---; Ar37 bk val,er = Average background @ --- @ ---; Ar36 bk val,er = Cubic @ --- @ ---; Ar36 = P @ --- @ ---; Ar37 = L @ --- @ ---; A…	furnace-38363	PPLLPAAAAA	1	Unknown	0	0	Furnace	16	16	0	0	0	0	300	300	0			0	2.69218	0.0060353	0.0223844	9.97e-05	0.0018824	3.58e-05	0.0007416	3.19e-05	0.0088457	3.14e-05	2.68747	0.00059	0.0224291	9e-05	0.0019811	1.8e-05
90223-5	RAG 1		32	2012-12-29	23.75	3439670000	Dan Barfod	basalt gm	2	Davide	Etna	130.209.21.222	8.058	Ar40 = L @ --- @ ---; Ar39 = L @ --- @ ---; Ar38 = L @ --- @ ---; Ar37 = L @ --- @ ---; Ar36 = L @ --- @ ---; Imported on Dec 31, 2012 @ --- @ ---; Ar40 bk val,er = Cubic @ --- @ ---; Ar39 bk val,er = Average background @ --- @ ---; Ar38 bk val,er = Cubic @ --- @ ---; Ar37 bk val,er = Average background @ --- @ ---; Ar36 bk val,er = Cubic @ --- @ ---; Ar36 = P @ --- @ ---; Ar37 = L @ --- @ ---; A…	furnace-38364	PPLLPAAAAA	1	Unknown	0	0	Furnace	20	20	0	0	0	0	300	300	0			0	3.35438	0.0060595	0.0256907	6.9e-05	0.0023439	3.86e-05	0.0012495	2.94e-05	0.0111255	4.28e-05	3.34497	0.00059	0.025706	5.4e-05	0.0024398	2.3e-05
90223-6	RAG 1		32	2012-12-30	0.283333	3439671000	Dan Barfod	basalt gm	2	Davide	Etna	130.209.21.222	8.058	Ar40 = L @ --- @ ---; Ar39 = L @ --- @ ---; Ar38 = L @ --- @ ---; Ar37 = L @ --- @ ---; Ar36 = L @ --- @ ---; Imported on Dec 31, 2012 @ --- @ ---; Ar40 bk val,er = Cubic @ --- @ ---; Ar39 bk val,er = Average background @ --- @ ---; Ar38 bk val,er = Cubic @ --- @ ---; Ar37 bk val,er = Average background @ --- @ ---; Ar36 bk val,er = Cubic @ --- @ ---; Ar36 = P @ --- @ ---; Ar37 = L @ --- @ ---; A…	furnace-38365	PPLLPAAAAA	1	Unknown	0	0	Furnace	25	25	0	0	0	0	300	300	0			0	6.9427	0.006111	0.0306713	6.9e-05	0.0046106	3.74e-05	0.0063798	3.69e-05	0.0229743	4.38e-05	6.89555	0.00082	0.0306422	5.4e-05	0.004693	2.1e-05
90223-7	RAG 1		32	2012-12-30	0.866667	3439674000	Dan Barfod	basalt gm	2	Davide	Etna	130.209.21.222	8.058	Ar40 = L @ --- @ ---; Ar39 = L @ --- @ ---; Ar38 = L @ --- @ ---; Ar37 = L @ --- @ ---; Ar36 = L @ --- @ ---; Imported on Dec 31, 2012 @ --- @ ---; Ar40 bk val,er = Cubic @ --- @ ---; Ar39 bk val,er = Average background @ --- @ ---; Ar38 bk val,er = Cubic @ --- @ ---; Ar37 bk val,er = Average background @ --- @ ---; Ar36 bk val,er = Cubic @ --- @ ---; Ar36 = P @ --- @ ---; Ar37 = L @ --- @ ---; A…	furnace-38366	PPLLPAAAAA	1	Unknown	0	0	Furnace	30	30	0	0	0	0	300	300	0			0	2.26089	0.006324	0.0102961	5.81e-05	0.0015193	3.4e-05	0.0018528	3e-05	0.0075408	3.13e-05	2.27686	0.00037	0.0104502	3.9e-05	0.0016202	1.4e-05
90223-8	RAG 1		32	2012-12-30	1.45	3439676000	Dan Barfod	basalt gm	2	Davide	Etna	130.209.21.222	8.058	Ar40 = L @ --- @ ---; Ar39 = L @ --- @ ---; Ar38 = L @ --- @ ---; Ar37 = L @ --- @ ---; Ar36 = L @ --- @ ---; Imported on Dec 31, 2012 @ --- @ ---; Ar40 bk val,er = Cubic @ --- @ ---; Ar39 bk val,er = Average background @ --- @ ---; Ar38 bk val,er = Cubic @ --- @ ---; Ar37 bk val,er = Average background @ --- @ ---; Ar36 bk val,er = Cubic @ --- @ ---; Ar36 = P @ --- @ ---; Ar37 = L @ --- @ ---; A…	furnace-38367	PPLLPAAAAA	1	Unknown	0	0	Furnace	40	40	0	0	0	0	300	300	0			0	0.826749	0.0067813	0.00221	6.98e-05	0.000623	4.31e-05	0.0005318	3.39e-05	0.0028107	3.7e-05	0.883019	0.00044	0.0024367	5.5e-05	0.0007293	3e-05
90223-9	RAG 1		32	2012-12-30	2.03333	3439678000	Dan Barfod	basalt gm	2	Davide	Etna	130.209.21.222	8.058	Ar40 = L @ --- @ ---; Ar39 = L @ --- @ ---; Ar38 = L @ --- @ ---; Ar37 = L @ --- @ ---; Ar36 = L @ --- @ ---; Imported on Dec 31, 2012 @ --- @ ---; Ar40 bk val,er = Cubic @ --- @ ---; Ar39 bk val,er = Average background @ --- @ ---; Ar38 bk val,er = Cubic @ --- @ ---; Ar37 bk val,er = Average background @ --- @ ---; Ar36 bk val,er = Cubic @ --- @ ---; Ar36 = P @ --- @ ---; Ar37 = L @ --- @ ---; A…	furnace-38368	PPLLPAAAAA	1	Unknown	0	0	Furnace	50	50	0	0	0	0	300	300	0			0	0.321875	0.007503	0.0003103	5.67e-05	0.0003064	3.49e-05	0.0001406	3.19e-05	0.0010756	4.23e-05	0.424383	0.00067	0.000554	3.7e-05	0.0004146	1.6e-05
90223-10	RAG 1		32	2012-12-30	2.61667	3439680000	Dan Barfod	basalt gm	2	Davide	Etna	130.209.21.222	8.058	Ar40 = L @ --- @ ---; Ar39 = L @ --- @ ---; Ar38 = L @ --- @ ---; Ar37 = L @ --- @ ---; Ar36 = L @ --- @ ---; Imported on Dec 31, 2012 @ --- @ ---; Ar40 bk val,er = Cubic @ --- @ ---; Ar39 bk val,er = Average background @ --- @ ---; Ar38 bk val,er = Cubic @ --- @ ---; Ar37 bk val,er = Average background @ --- @ ---; Ar36 bk val,er = Cubic @ --- @ ---; Ar36 = P @ --- @ ---; Ar37 = L @ --- @ ---; A…	furnace-38369	PPLLPAAAAA	1	Unknown	0	0	Furnace	50	50	0	0	0	0	300	300	0			0	0.217944	0.0074775	5.05e-05	6.75e-05	0.0001584	3.69e-05	4.08e-05	2.94e-05	0.0008322	3.88e-05	0.321694	0.00026	0.0002965	5.2e-05	0.0002675	2e-05
90225-11	RAG 2		32	2012-12-31	16.9667	3439818000	Dan Barfod	basalt gm	4	Davide	Etna	130.209.21.222	8.058	Ar40 = L @ --- @ ---; Ar39 = L @ --- @ ---; Ar38 = L @ --- @ ---; Ar37 = L @ --- @ ---; Ar36 = L @ --- @ ---; Imported on Jan 3, 2013 @ --- @ ---; Ar40 bk val,er = Cubic @ --- @ ---; Ar39 bk val,er = Average background @ --- @ ---; Ar38 bk val,er = Cubic @ --- @ ---; Ar37 bk val,er = Average background @ --- @ ---; Ar36 bk val,er = Cubic @ --- @ ---; Ar36 = P @ --- @ ---; Ar37 = L @ --- @ ---; Ar…	furnace-38393	PPLLPAAAAA	1	Unknown	0	0	Furnace	9	9	0	0	0	0	300	300	0			0	0.0888114	0.0055607	0.0001239	7.93e-05	-6.35713e-07	2.83e-05	5.78e-05	2.67e-05	0.0003365	4.45e-05	0.11376	0.0021	0.0003907	7.4e-05	0.0001236	2e-05
90225-12	RAG 2		32	2012-12-31	17.8	3439821000	Dan Barfod	basalt gm	4	Davide	Etna	130.209.21.222	8.058	Ar40 = L @ --- @ ---; Ar39 = L @ --- @ ---; Ar38 = L @ --- @ ---; Ar37 = L @ --- @ ---; Ar36 = L @ --- @ ---; Imported on Jan 3, 2013 @ --- @ ---; Ar40 bk val,er = Cubic @ --- @ ---; Ar39 bk val,er = Average background @ --- @ ---; Ar38 bk val,er = Cubic @ --- @ ---; Ar37 bk val,er = Average background @ --- @ ---; Ar36 bk val,er = Cubic @ --- @ ---; Ar36 = P @ --- @ ---; Ar36 = P @ --- @ ---; Ar…	furnace-38394	PPLLPAAAAA	1	Unknown	0	0	Furnace	10	10	0	0	0	0	300	300	0			0	0.282179	0.0063896	0.0017681	5.41e-05	0.0002329	3.05e-05	0.0001807	4e-05	0.0009833	5.26e-05	0.30607	0.0038	0.0020229	4.6e-05	0.0003572	2.3e-05
90225-13	RAG 2		32	2012-12-31	18.3167	3439823000	Dan Barfod	basalt gm	4	Davide	Etna	130.209.21.222	8.058	Ar40 = L @ --- @ ---; Ar39 = L @ --- @ ---; Ar38 = L @ --- @ ---; Ar37 = L @ --- @ ---; Ar36 = L @ --- @ ---; Imported on Jan 3, 2013 @ --- @ ---; Ar40 bk val,er = Cubic @ --- @ ---; Ar39 bk val,er = Average background @ --- @ ---; Ar38 bk val,er = Cubic @ --- @ ---; Ar37 bk val,er = Average background @ --- @ ---; Ar36 bk val,er = Cubic @ --- @ ---; Ar36 = P @ --- @ ---; Ar37 = L @ --- @ ---; Ar…	furnace-38395	PPLLPAAAAA	1	Unknown	0	0	Furnace	13	13	0	0	0	0	300	300	0			0	3.62438	0.0052818	0.0351572	9.91e-05	0.0027103	3.43e-05	0.0016574	4.15e-05	0.0117571	4.38e-05	3.61749	0.00073	0.0351617	9.5e-05	0.0028259	2.8e-05
90225-14	RAG 2		32	2012-12-31	18.9	3439825000	Dan Barfod	basalt gm	4	Davide	Etna	130.209.21.222	8.058	Ar40 = L @ --- @ ---; Ar39 = L @ --- @ ---; Ar38 = L @ --- @ ---; Ar37 = L @ --- @ ---; Ar36 = L @ --- @ ---; Imported on Jan 3, 2013 @ --- @ ---; Ar40 bk val,er = Cubic @ --- @ ---; Ar39 bk val,er = Average background @ --- @ ---; Ar38 bk val,er = Cubic @ --- @ ---; Ar37 bk val,er = Average background @ --- @ ---; Ar36 bk val,er = Cubic @ --- @ ---; Ar36 = P @ --- @ ---; Ar37 = L @ --- @ ---; Ar…	furnace-38396	PPLLPAAAAA	1	Unknown	0	0	Furnace	16	16	0	0	0	0	300	300	0			0	2.53931	0.0053426	0.0244138	3.55e-05	0.001899	3.1e-05	0.0008467	3.06e-05	0.0083985	4.49e-05	2.54627	0.00041	0.0245008	2.2e-05	0.0020224	2.4e-05
90225-15	RAG 2		32	2012-12-31	19.4833	3439827000	Dan Barfod	basalt gm	4	Davide	Etna	130.209.21.222	8.058	Ar40 = L @ --- @ ---; Ar39 = L @ --- @ ---; Ar38 = L @ --- @ ---; Ar37 = L @ --- @ ---; Ar36 = L @ --- @ ---; Imported on Jan 3, 2013 @ --- @ ---; Ar40 bk val,er = Cubic @ --- @ ---; Ar39 bk val,er = Average background @ --- @ ---; Ar38 bk val,er = Cubic @ --- @ ---; Ar37 bk val,er = Average background @ --- @ ---; Ar36 bk val,er = Cubic @ --- @ ---; Ar36 = P @ --- @ ---; Ar37 = L @ --- @ ---; Ar…	furnace-38397	PPLLPAAAAA	1	Unknown	0	0	Furnace	20	20	0	0	0	0	300	300	0			0	2.04449	0.0053581	0.0241143	5.12e-05	0.001487	2.65e-05	0.0010587	3.19e-05	0.0067078	4.62e-05	2.06073	0.00032	0.0242055	4.3e-05	0.0016174	1.8e-05
90225-16	RAG 2		32	2012-12-31	20.0667	3439829000	Dan Barfod	basalt gm	4	Davide	Etna	130.209.21.222	8.058	Ar40 = L @ --- @ ---; Ar39 = L @ --- @ ---; Ar38 = L @ --- @ ---; Ar37 = L @ --- @ ---; Ar36 = L @ --- @ ---; Imported on Jan 3, 2013 @ --- @ ---; Ar40 bk val,er = Cubic @ --- @ ---; Ar39 bk val,er = Average background @ --- @ ---; Ar38 bk val,er = Cubic @ --- @ ---; Ar37 bk val,er = Average background @ --- @ ---; Ar36 bk val,er = Cubic @ --- @ ---; Ar36 = P @ --- @ ---; Ar37 = L @ --- @ ---; Ar…	furnace-38398	PPLLPAAAAA	1	Unknown	0	0	Furnace	25	25	0	0	0	0	300	300	0			0	3.44007	0.0054344	0.0291419	7.07e-05	0.0024362	3.67e-05	0.0056134	3.13e-05	0.0113339	4.64e-05	3.44885	0.00083	0.0291979	6.5e-05	0.002568	3.1e-05
90225-17	RAG 2		32	2012-12-31	20.65	3439831000	Dan Barfod	basalt gm	4	Davide	Etna	130.209.21.222	8.058	Ar40 = L @ --- @ ---; Ar39 = L @ --- @ ---; Ar38 = L @ --- @ ---; Ar37 = L @ --- @ ---; Ar36 = L @ --- @ ---; Imported on Jan 3, 2013 @ --- @ ---; Ar40 bk val,er = Cubic @ --- @ ---; Ar39 bk val,er = Average background @ --- @ ---; Ar38 bk val,er = Cubic @ --- @ ---; Ar37 bk val,er = Average background @ --- @ ---; Ar36 bk val,er = Cubic @ --- @ ---; Ar36 = P @ --- @ ---; Ar37 = L @ --- @ ---; Ar…	furnace-38399	PPLLPAAAAA	1	Unknown	0	0	Furnace	30	30	0	0	0	0	300	300	0			0	1.54346	0.0056213	0.0137617	7.37e-05	0.0010961	2.89e-05	0.0024885	2.65e-05	0.0051096	5.14e-05	1.57893	0.0005	0.0139344	6.8e-05	0.0012408	2.1e-05
90225-18	RAG 2		32	2012-12-31	21.2333	3439833000	Dan Barfod	basalt gm	4	Davide	Etna	130.209.21.222	8.058	Ar40 = L @ --- @ ---; Ar39 = L @ --- @ ---; Ar38 = L @ --- @ ---; Ar37 = L @ --- @ ---; Ar36 = L @ --- @ ---; Imported on Jan 3, 2013 @ --- @ ---; Ar40 bk val,er = Cubic @ --- @ ---; Ar39 bk val,er = Average background @ --- @ ---; Ar38 bk val,er = Cubic @ --- @ ---; Ar37 bk val,er = Average background @ --- @ ---; Ar36 bk val,er = Cubic @ --- @ ---; Ar36 = P @ --- @ ---; Ar36 = P @ --- @ ---; Ar…	furnace-38400	PPLLPAAAAA	1	Unknown	0	0	Furnace	40	40	0	0	0	0	300	300	0			0	0.5064	0.0060207	0.0024321	7.34e-05	0.0003151	3.19e-05	0.0005196	3.39e-05	0.0016295	6.18e-05	0.573926	0.00048	0.0026925	6.7e-05	0.0004759	2.4e-05
90225-19	RAG 2		32	2012-12-31	21.8167	3439835000	Dan Barfod	basalt gm	4	Davide	Etna	130.209.21.222	8.058	Ar40 = L @ --- @ ---; Ar39 = L @ --- @ ---; Ar38 = L @ --- @ ---; Ar37 = L @ --- @ ---; Ar36 = L @ --- @ ---; Imported on Jan 3, 2013 @ --- @ ---; Ar40 bk val,er = Cubic @ --- @ ---; Ar39 bk val,er = Average background @ --- @ ---; Ar38 bk val,er = Cubic @ --- @ ---; Ar37 bk val,er = Average background @ --- @ ---; Ar36 bk val,er = Cubic @ --- @ ---; Ar36 = P @ --- @ ---; Ar37 = L @ --- @ ---; Ar…	furnace-38401	PPLLPAAAAA	1	Unknown	0	0	Furnace	50	50	0	0	0	0	300	300	0			0	0.238951	0.0066666	0.0002748	7.72e-05	0.0001524	2.8e-05	0.000146	3.41e-05	0.0009706	5.94e-05	0.341902	0.00072	0.0005546	7e-05	0.0003263	1.6e-05
90225-20	RAG 2		32	2012-12-31	22.4	3439837000	Dan Barfod	basalt gm	4	Davide	Etna	130.209.21.222	8.058	Ar40 = L @ --- @ ---; Ar39 = L @ --- @ ---; Ar38 = L @ --- @ ---; Ar37 = L @ --- @ ---; Ar36 = L @ --- @ ---; Imported on Jan 3, 2013 @ --- @ ---; Ar40 bk val,er = Cubic @ --- @ ---; Ar39 bk val,er = Average background @ --- @ ---; Ar38 bk val,er = Cubic @ --- @ ---; Ar37 bk val,er = Average background @ --- @ ---; Ar36 bk val,er = Cubic @ --- @ ---; Ar36 = P @ --- @ ---; Ar36 = P @ --- @ ---; Ar…	furnace-38402	PPLLPAAAAA	1	Unknown	0	0	Furnace	50	50	0	0	0	0	300	300	0			0	0.108478	0.0066496	0.0001105	4.72e-05	5.63151e-06	3.32e-05	1.96121e-06	3.61e-05	0.0003846	5.81e-05	0.212714	0.00054	0.0003915	3.4e-05	0.0001803	2.4e-05
90227-21	RAG 3		32	2013-01-03	12.35	3440060000	Dan Barfod	basalt gm	6	Davide	Etna	130.209.21.222	8.058	Ar40 = L @ --- @ ---; Ar39 = L @ --- @ ---; Ar38 = L @ --- @ ---; Ar37 = L @ --- @ ---; Ar36 = L @ --- @ ---; Imported on Jan 4, 2013 @ --- @ ---; Ar40 bk val,er = Cubic @ --- @ ---; Ar39 bk val,er = Average background @ --- @ ---; Ar38 bk val,er = Cubic @ --- @ ---; Ar37 bk val,er = Average background @ --- @ ---; Ar36 bk val,er = Cubic @ --- @ ---; Ar36 = P @ --- @ ---; Ar37 = L @ --- @ ---; Ar…	furnace-38426	PPLLPAAAAA	1	Unknown	0	0	Furnace	9	9	0	0	0	0	300	300	0			0	0.127707	0.0008858	0.000217	6.7e-05	7.93e-05	3.08e-05	7.52e-05	4.69e-05	0.0004616	3.25e-05	0.157694	0.00033	0.0004934	6.2e-05	0.0001908	1.9e-05
90227-22	RAG 3		32	2013-01-03	12.8833	3440062000	Dan Barfod	basalt gm	6	Davide	Etna	130.209.21.222	8.058	Ar40 = L @ --- @ ---; Ar39 = L @ --- @ ---; Ar38 = L @ --- @ ---; Ar37 = L @ --- @ ---; Ar36 = L @ --- @ ---; Imported on Jan 4, 2013 @ --- @ ---; Ar40 bk val,er = Cubic @ --- @ ---; Ar39 bk val,er = Average background @ --- @ ---; Ar38 bk val,er = Cubic @ --- @ ---; Ar37 bk val,er = Average background @ --- @ ---; Ar36 bk val,er = Cubic @ --- @ ---; Ar36 = P @ --- @ ---; Ar37 = L @ --- @ ---; Ar…	furnace-38427	PPLLPAAAAA	1	Unknown	0	0	Furnace	10	10	0	0	0	0	300	300	0			0	0.612772	0.0009214	0.0072289	4.65e-05	0.0004956	3.48e-05	0.0003286	4.58e-05	0.0019698	4.01e-05	0.641456	0.0004	0.0074759	3.9e-05	0.0006078	2.5e-05
90227-23	RAG 3		32	2013-01-03	13.4667	3440064000	Dan Barfod	basalt gm	6	Davide	Etna	130.209.21.222	8.058	Ar40 = L @ --- @ ---; Ar39 = L @ --- @ ---; Ar38 = L @ --- @ ---; Ar37 = L @ --- @ ---; Ar36 = L @ --- @ ---; Imported on Jan 4, 2013 @ --- @ ---; Ar40 bk val,er = Cubic @ --- @ ---; Ar39 bk val,er = Average background @ --- @ ---; Ar38 bk val,er = Cubic @ --- @ ---; Ar37 bk val,er = Average background @ --- @ ---; Ar36 bk val,er = Cubic @ --- @ ---; Ar36 = P @ --- @ ---; Ar37 = L @ --- @ ---; Ar…	furnace-38428	PPLLPAAAAA	1	Unknown	0	0	Furnace	13	13	0	0	0	0	300	300	0			0	2.29839	0.0010378	0.0295934	8.76e-05	0.0017468	2.99e-05	0.0011464	4.78e-05	0.0074604	3.28e-05	2.32102	0.00055	0.0297473	8.4e-05	0.0018609	1.8e-05
90227-24	RAG 3		32	2013-01-03	14.05	3440067000	Dan Barfod	basalt gm	6	Davide	Etna	130.209.21.222	8.058	Ar40 = L @ --- @ ---; Ar39 = L @ --- @ ---; Ar38 = L @ --- @ ---; Ar37 = L @ --- @ ---; Ar36 = L @ --- @ ---; Imported on Jan 4, 2013 @ --- @ ---; Ar40 bk val,er = Cubic @ --- @ ---; Ar39 bk val,er = Average background @ --- @ ---; Ar38 bk val,er = Cubic @ --- @ ---; Ar37 bk val,er = Average background @ --- @ ---; Ar36 bk val,er = Cubic @ --- @ ---; Ar36 = P @ --- @ ---; Ar37 = L @ --- @ ---; Ar…	furnace-38429	PPLLPAAAAA	1	Unknown	0	0	Furnace	16	16	0	0	0	0	300	300	0			0	2.12859	0.0010835	0.0207099	6.03e-05	0.0015639	2.86e-05	0.0005973	4.47e-05	0.0070054	3.85e-05	2.15453	0.00056	0.020902	5.5e-05	0.001684	1.6e-05
90227-25	RAG 3		32	2013-01-03	14.6333	3440069000	Dan Barfod	basalt gm	6	Davide	Etna	130.209.21.222	8.058	Ar40 = L @ --- @ ---; Ar39 = L @ --- @ ---; Ar38 = L @ --- @ ---; Ar37 = L @ --- @ ---; Ar36 = L @ --- @ ---; Imported on Jan 4, 2013 @ --- @ ---; Ar40 bk val,er = Cubic @ --- @ ---; Ar39 bk val,er = Average background @ --- @ ---; Ar38 bk val,er = Cubic @ --- @ ---; Ar37 bk val,er = Average background @ --- @ ---; Ar36 bk val,er = Cubic @ --- @ ---; Ar36 = P @ --- @ ---; Ar37 = L @ --- @ ---; Ar…	furnace-38430	PPLLPAAAAA	1	Unknown	0	0	Furnace	20	20	0	0	0	0	300	300	0			0	2.38451	0.0010515	0.024591	5.4e-05	0.0017236	2.91e-05	0.0009215	4.69e-05	0.0077698	3.02e-05	2.41129	0.00042	0.0247682	4.8e-05	0.0018506	1.7e-05
90225-26	RAG 3		32	2013-01-03	15.2	3440071000	Dan Barfod	basalt gm	4	Davide	Etna	130.209.21.222	8.058	Ar40 = L @ --- @ --- @ ---; Ar39 = L @ --- @ --- @ ---; Ar38 = L @ --- @ --- @ ---; Ar37 = L @ --- @ --- @ ---; Ar36 = L @ --- @ --- @ ---; Imported on Jan 3, 2013 @ --- @ --- @ ---; Cubic @ 03/01/2013 17:08 @ --- @ ---; Average background @ 03/01/2013 17:08 @ --- @ ---; Cubic @ 03/01/2013 17:08 @ --- @ ---; Average background @ 03/01/2013 17:08 @ --- @ ---; Cubic @ 03/01/2013 17:08Ar40 bk val,er…	furnace-38431	PPLLPAAAAA	1	Unknown	0	0	Furnace	25	25	0	0	0	0	300	300	0			0	4.49016	0.0012623	0.023422	5.14e-05	0.0030655	3.23e-05	0.004566	5.22e-05	0.0148057	4.3e-05	4.50834	0.00078	0.0236053	4.5e-05	0.003198	2.2e-05
90227-27	RAG 3		32	2013-01-03	15.7833	3440073000	Dan Barfod	basalt gm	6	Davide	Etna	130.209.21.222	8.058	Ar40 = L @ --- @ ---; Ar39 = L @ --- @ ---; Ar38 = L @ --- @ ---; Ar37 = L @ --- @ ---; Ar36 = L @ --- @ ---; Imported on Jan 4, 2013 @ --- @ ---; Ar40 bk val,er = Cubic @ --- @ ---; Ar39 bk val,er = Average background @ --- @ ---; Ar38 bk val,er = Cubic @ --- @ ---; Ar37 bk val,er = Average background @ --- @ ---; Ar36 bk val,er = Cubic @ --- @ ---; Ar36 = P @ --- @ ---; Ar37 = L @ --- @ ---; Ar…	furnace-38432	PPLLPAAAAA	1	Unknown	0	0	Furnace	30	30	0	0	0	0	300	300	0			0	3.42146	0.0012058	0.0179112	6.69e-05	0.002301	3.33e-05	0.0031806	4.8e-05	0.0113315	4.2e-05	3.45044	0.00062	0.0181182	6.2e-05	0.0024447	2.3e-05
90225-28	RAG 3		32	2013-01-03	16.3667	3440075000	Dan Barfod	basalt gm	4	Davide	Etna	130.209.21.222	8.058	Ar40 = L @ --- @ --- @ ---; Ar39 = L @ --- @ --- @ ---; Ar38 = L @ --- @ --- @ ---; Ar37 = L @ --- @ --- @ ---; Ar36 = L @ --- @ --- @ ---; Imported on Jan 3, 2013 @ --- @ --- @ ---; Cubic @ 03/01/2013 17:08 @ --- @ ---; Average background @ 03/01/2013 17:08 @ --- @ ---; Cubic @ 03/01/2013 17:08 @ --- @ ---; Average background @ 03/01/2013 17:08 @ --- @ ---; Cubic @ 03/01/2013 17:08Ar40 bk val,er…	furnace-38433	PPLLPAAAAA	1	Unknown	0	0	Furnace	40	40	0	0	0	0	300	300	0			0	0.600877	0.0010681	0.0017858	5.67e-05	0.0003305	3.18e-05	0.0003677	4.83e-05	0.0020355	2.03e-05	0.669058	0.00024	0.0020595	5e-05	0.0004977	1.9e-05
90225-29	RAG 3		32	2013-01-03	16.95	3440077000	Dan Barfod	basalt gm	4	Davide	Etna	130.209.21.222	8.058	Ar40 = L @ --- @ ---; Ar39 = L @ --- @ ---; Ar38 = L @ --- @ ---; Ar37 = L @ --- @ ---; Ar36 = L @ --- @ ---; Imported on Jan 4, 2013 @ --- @ ---; Ar40 bk val,er = Cubic @ --- @ ---; Ar39 bk val,er = Average background @ --- @ ---; Ar38 bk val,er = Cubic @ --- @ ---; Ar37 bk val,er = Average background @ --- @ ---; Ar36 bk val,er = Cubic @ --- @ ---; Ar36 = P @ --- @ ---; Ar37 = L @ --- @ ---; Ar…	furnace-38434	PPLLPAAAAA	1	Unknown	0	0	Furnace	50	50	0	0	0	0	300	300	0			0	0.321454	0.0013311	0.0002392	5.36e-05	0.0001531	3.42e-05	4.5e-05	5.1e-05	0.0011043	4.65e-05	0.447795	0.00082	0.0005203	4.5e-05	0.000339	2e-05
90227-30	RAG 3		32	2013-01-03	17.5333	3440079000	Dan Barfod	basalt gm	6	Davide	Etna	130.209.21.222	8.058	Ar40 = L @ --- @ ---; Ar39 = L @ --- @ ---; Ar38 = L @ --- @ ---; Ar37 = L @ --- @ ---; Ar36 = L @ --- @ ---; Imported on Jan 4, 2013 @ --- @ ---; Ar40 bk val,er = Cubic @ --- @ ---; Ar39 bk val,er = Average background @ --- @ ---; Ar38 bk val,er = Cubic @ --- @ ---; Ar37 bk val,er = Average background @ --- @ ---; Ar36 bk val,er = Cubic @ --- @ ---; Discrimination obtained from Cubic fit of air-…	furnace-38435	LLLLLAAAAA	1	Unknown	0	0	Furnace	50	50	0	0	0	0	300	300	0			0	0.132372	0.0012607	0.0001356	6.13e-05	0.0001261	4.02e-05	3.47e-05	5.31e-05	0.0004637	2.66e-05	0.259726	0.0007	0.0004171	5.4e-05	0.0003121	2.9e-05
--- Atmospheric argon ratios and discrimination ---
(40Ar/36Ar)atm	298.56 Â± 0.31
(40Ar/38Ar)atm	1583.5 Â± 2.5
Source of spectrometer discrimination value and error	Data file, unless saved
Source of spectrometer sensitivity value and error	Saved with run
Source of detector intercalibration value and error	Data file, unless saved
--- Source of J and use of J Adjustment Table ---
Use J saved with run	FALSE
J adjustment table useage	Multiply times J
--- Minor irradiation parameters (see also Irradiation Data File) ---
(38Ar/37Ar)Ca	0.0000196 Â± 8.160000e-7
(38Ar/39Ar)K	0.0122 Â± 0.000027
P(36Cl/38Cl)	262.9 Â± 1.1
--- Decay constants ---
Lambda 40K epsilon	5.757000e-11 Â± 1.600000e-13
Lambda 40K Beta	4.955000e-10 Â± 1.340000e-12
Lambda 37Ar	0.01983 Â± 0.0000454
Lambda 39Ar	7.068000e-6 Â± 7.882200e-8
Lambda 36Cl	6.308000e-9 Â± 0
--- Calculation options ---
Normalize gain	FALSE
Use volume fraction delivered to ms to normalize gain	FALSE
Always calculate without ratios	FALSE
Calc. %40Ar* as %40*/(40*+40Atm)	TRUE
Number of trials in Monte Carlo sim.	10
37Ar/39Ar calculation	Normal
--- Isotope curve fitting ---
Parabolic vs. Linear probability cutoff	0.05
Error envelope as 1 or 2 sigma	2
Delete outliers within cycles before fit	TRUE
Average cycles before fit	FALSE
Delete outliers after fit	TRUE
Number of iterations of deleting outliers after fit	1
Cutoff for detecting outliers, sigma	2
Method of centroid location is	mean
--- Files ---
Irradiation data file	/wilderland:CURRENT WORK:KAr:Untitled
J Adjustment table	/wilderland:CURRENT WORK:KAr:Untitled
[truncated: 115 more columns]

## Sheet: Pernicana ArAr table
D'Amato et al., HOLOCENE SLIP RATE VARIABILITY ALONG THE PERNICANA FAULT SYSTEM (MT. ETNA, ITALY): EVIDENCE FROM OFFSET LAVA FLOWS.
Sample	ID	Material	Plateau age (Ma)	±1s w/o J	±1s w/ J	MSWD	Prob.	steps	n/n-total	%gas	mol 39Ar		Isochron age (Ma)	±1s	±1s (%)	40Ar/36Ar(i)	±1s	MSWD	p	n		Integrated age (Ma)	±1s	int. 40Ar* /39ArK	%radiogenic	Ca/K	±1s Ca/K
RAG 1	90223	Groundmass	0.0095	0.0011	0.0011	0.98	0.44	2-10	8/10	98	9.64363e-15		0.0075	0.0022	28.9	299.5	1.5	1.1	0.38	8		0.0068	0.0017	1.52266	0.9	4.5152	0.5611
RAG 2	90225	Groundmass	0.0097	0.0015	0.0015	1.06	0.38	11-17	7/10	98.1	9.2201e-15		0.0061	0.0026	36.5	301	9.5	1.3	0.28	7		0.0072	0.0029	1.62593	1.5	4.386	0.4507
RAG 3	90227	Groundmass	0.0106	0.0013	0.0013	0.7	0.71	21-30	10/10	100	8.9675e-15		0.0124	0.0028	22.3	297.3	2.1	0.76	0.64	10		0.0098	0.0029	2.26842	1.7	4.6354	0.4116
		composite	0.0099	0.0007	0.0007	0.83	0.7	25	25/25	100	2.78312e-14		0.0099	0.0015	14.9	298.6	1	0.87	0.64	25		-	-	-	-	-	-
